# Supplementary material
Source: PubMed Central journal article supplement (PMC4459505)
Supplement: NIHMS661936-supplement-1.pdf [file NIHMS661936-supplement-1.pdf]

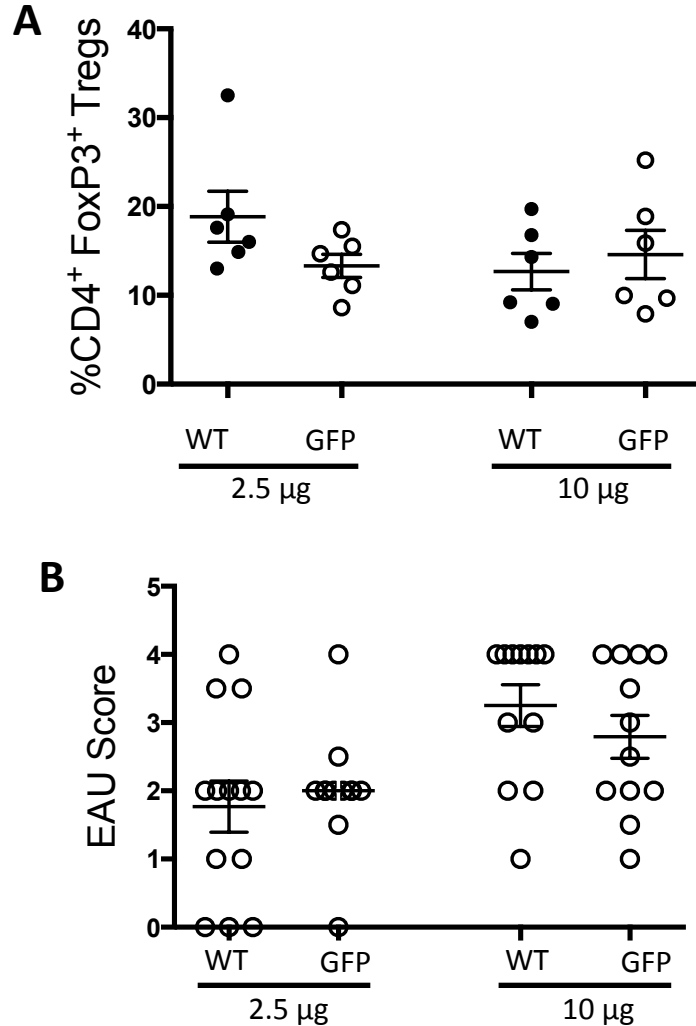

**Figure S1. WT mice and FoxP3-GFP reporter have similar Treg numbers and develop similar EAU scores in vivo.**

B10.RIII WT and B10.RIII FoxP3-GFP reporter mice (GFP) were immunized with 2.5 or 10 µg of IRBP161-180. Eyes were harvested 21 days later. A) CD4<sup>+</sup>FoxP3<sup>+</sup> eye cells were detected by flow cytometry. Each symbol represents the combined data of one eye from 2 mice. B) Histology. Each symbol represents one eye of each of the 12 mice per immunization dose (For A and B: Shown is mean +/- SEM. Unpaired t-test= ns for WT vs GFP-reporter mice at all doses).

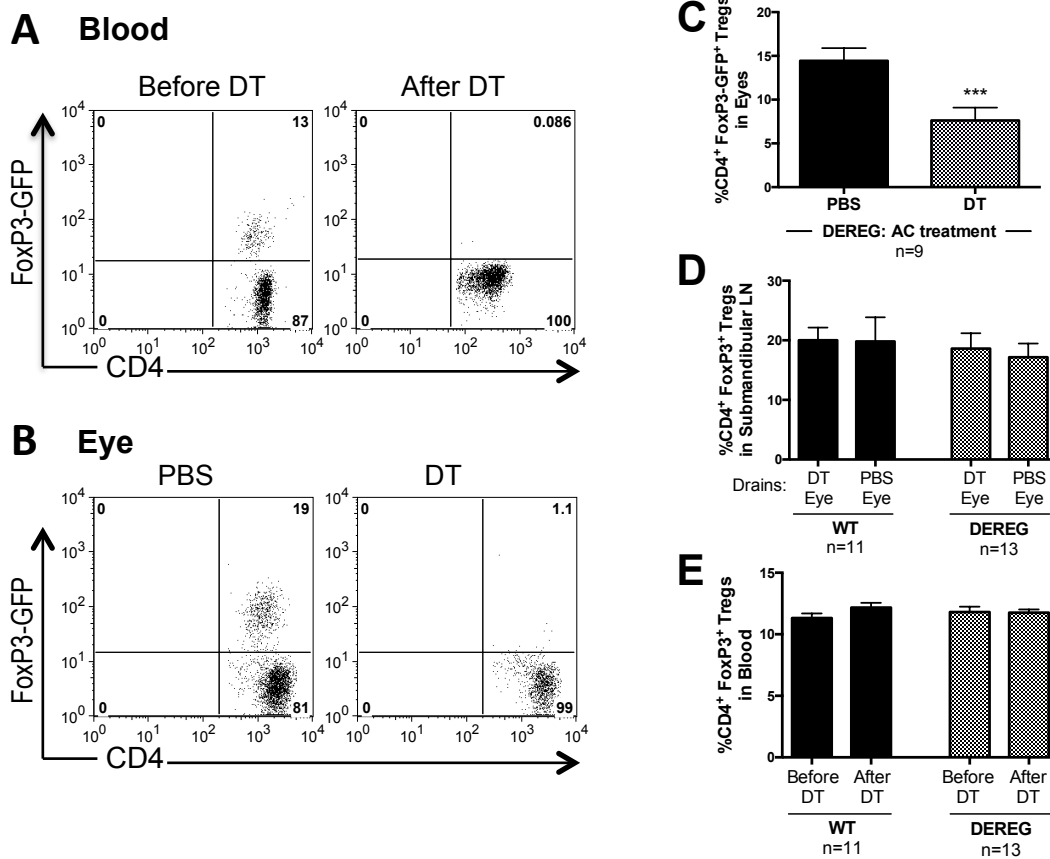

**Figure S2. Systemic DT injection depletes Tregs in the periphery and in the eye, whereas AC injection of DT depletes Tregs only in the eye.**

The indicated mice (DEREG or WT) were challenged for EAU. **A-B:** DERE mice were treated with DT systemically. (A) Tregs in blood. DT was injected i.p. at peak disease on 2 successive days. CD4<sup>+</sup>FoxP3-GFP Tregs were assayed from tail bleeds by flow cytometry before EAU challenge and DT treatment, and again 48 h after the last DT treatment. Shown is one representative mouse. Verification of Treg depletion in blood samples was completed on all experimental mice. (B) Tregs in the eye. CD4<sup>+</sup>FoxP3-GFP Tregs were assayed (in different mice) 48h after administration of either PBS or DT. Shown is 1 representative experiment of 3. **C-E:** WT or DERE mice injected with DT into the AC. Contralateral eye received PBS. (C) Eyes. AC delivery of DT depletes Tregs from the eyes of EAU-challenged DERE mice. CD4<sup>+</sup>FoxP3-GFP Tregs assayed 36 h after the last treatment (paired t-test:  $p < 0.0002$  for mouse's PBS-injected eye vs. its own DT-injected eye). (D) Submandibular LNs. The CD4<sup>+</sup>FoxP3<sup>+</sup> Tregs from the submandibular LN draining the DT-injected eye of each DERE and WT mouse was compared to that of its own submandibular LN draining the PBS-injected eye 36 h after the last AC treatment (paired t-test=ns). (E) Blood. The CD4<sup>+</sup>FoxP3<sup>+</sup> Tregs from the blood of each DERE and each WT mouse 24 h prior to AC treatments was compared to its own blood 36 h after the last DT treatment. (paired t-test=ns). The average value +/- SEM for each group are shown for C, D, and E.

**Table S1** Flow cytometric analysis of cells in eyes of individual mice<sup>1</sup>

**C57BL/6**

| Naive    |           | 21 days      |                |               | 3 months   |           |              |
|----------|-----------|--------------|----------------|---------------|------------|-----------|--------------|
| FoxP3+   | FoxP3-    | FoxP3+       | % <sup>2</sup> | FoxP3-        | FoxP3+     | %         | FoxP3-       |
| 2        | 23        | 5185         | 10.5           | 44077         | 1283       | 21.6      | 4666         |
| 8        | 77        | 4885         | 12.1           | 35427         | 426        | 18        | 1936         |
| 1        | 9         | 6579         | 10.1           | 58245         | 521        | 22.4      | 1807         |
| 1        | 1         | 15044        | 7.1            | 197436        | 727        | 19.9      | 2926         |
| 1        | 1         | 5218         | 10             | 46760         | 6          | 7.6       | 73           |
| 10       | 8         | 7688         | 12.5           | 54044         | 1523       | 20.3      | 5512         |
| 4        | 6         | 7854         | 12.3           | 55819         |            |           | 4281         |
| 4        | 18        | 13641        | 19.6           | 55819         |            |           |              |
| 3        | 48        |              |                |               |            |           |              |
| <b>4</b> | <b>21</b> | <b>8,262</b> | <b>12</b>      | <b>68,453</b> | <b>748</b> | <b>18</b> | <b>3,029</b> |

AV

**B10.RIII**

| Naive    |           | 17 days      |           |               | 2 months   |           |            |
|----------|-----------|--------------|-----------|---------------|------------|-----------|------------|
| FoxP3+   | FoxP3-    | FoxP3+       | %         | FoxP3-        | FoxP3+     | %         | FoxP3-     |
| 6        | 38        | 2962         | 15.8      | 15798         | 21         | 14.9      | 121        |
| 4        | 10        | 2983         | 16.6      | 15032         | 843        | 31.7      | 1818       |
| 3        | 18        | 3252         | 15.3      | 18020         | 309        | 29.7      | 730        |
| 18       | 66        | 4419         | 14.1      | 26843         | 28         | 26.7      | 77         |
| 7        | 12        | 5860         | 15.2      | 32613         | 191        | 25.7      | 553        |
| 6        | 23        | 4385         | 18.6      | 19202         | 806        | 37.8      | 1328       |
|          |           | 3929         | 18.5      | 17344         |            |           |            |
|          |           | 2586         | 17        | 12609         |            |           |            |
|          |           | 3004         | 15.2      | 16736         |            |           |            |
|          |           | 2345         | 15.5      | 12796         |            |           |            |
| <b>7</b> | <b>28</b> | <b>3,573</b> | <b>16</b> | <b>18,699</b> | <b>366</b> | <b>28</b> | <b>771</b> |

AV

<sup>1</sup> Both eyes are combined

<sup>2</sup>percent of total CD4<sup>+</sup> cells (Foxp3<sup>+</sup> and Foxp3<sup>-</sup>)

AV = average

Table S2 Infiltrating cells in eyes of individual mice<sup>1</sup>

| DT and PBS administered at Peak disease |       |         |       | DT and PBS administered after Resolution |       |         |       |
|-----------------------------------------|-------|---------|-------|------------------------------------------|-------|---------|-------|
| DEREG MICE                              |       | WT Mice |       | DEREG MICE                               |       | WT Mice |       |
| DT                                      | PBS   | DT      | PBS   | DT                                       | PBS   | DT      | PBS   |
| 183                                     | 115.5 | 122     | 286   | 385.5                                    | 38.5  | 196.5   | 114   |
| 124                                     | 305.5 | 210.5   | 205.5 | 927                                      | 77    | 24      | 23.5  |
| 308.5                                   | 372   | 392     | 163.5 | 134.5                                    | 115.5 | 35.5    | 43    |
| 158.5                                   | 390   | 40.5    | 241.5 | 147.5                                    | 175.5 | 152.5   | 316.5 |
| 50                                      | 19    | 281     | 260   | 375.5                                    | 136   | 221     | 34.5  |
| 364                                     | 191.7 | 153     | 48    | 205.5                                    | 174.5 | 20      | 119.5 |
| 452                                     | 600   | 98      | 161   | 587                                      | 216.5 | 94.5    | 23.5  |
| 95.5                                    | 472.7 | 169     | 255.5 | 365                                      | 62.5  | 130.5   | 24.5  |
| 455.5                                   | 187.5 | 52      | 92.5  | 214                                      | 26.5  | 347.5   | 124.3 |
| 374.5                                   | 20    | 80.5    | 96    | 472                                      | 282.5 | 123     | 24    |
| 233.5                                   | 145.5 | 293.5   | 336.5 | 528                                      | 72.5  | 148     | 67    |
| 403                                     | 23    | 216.5   | 266.5 | 299.5                                    | 28.5  | 286.5   | 267.5 |
| 915                                     | 724.5 | 108     | 86.5  | 79.5                                     | 15.5  | 212     | 240   |
| 231.5                                   | 160   | 182.5   | 275.5 | 727.5                                    | 67    | 202.5   | 285.5 |
| 434                                     | 161.5 | 57.5    | 35    | 316                                      | 5.5   | 117     | 130   |
| 278.5                                   | 96    | 409     | 68    | 560                                      | 412.5 | 29      | 25.5  |
| 250.5                                   | 20.5  | 480.5   | 184.5 | 298.5                                    | 42.5  | 25.5    | 47.5  |
| 783.5                                   | 318   | 96      | 103.5 | 487                                      | 126   | 11.5    | 6.5   |
| 479                                     | 152.5 | 387.5   | 173.5 | 13                                       | 1.5   | 184.5   | 105   |
| 324.5                                   | 242   | 210     | 116.5 | 104                                      | 72.5  | 27      | 34.5  |
| 147.5                                   | 123   | 248.5   | 240   | 136.5                                    | 59.5  | 33.5    | 1     |
| 475                                     | 134   | 381.5   | 250.5 | 43.5                                     | 20    | 157.7   | 148.5 |
| 168                                     | 97.5  | 303     | 350   | 23.5                                     | 119.5 | 121     | 313.5 |
| 981.5                                   | 233.5 | 185     | 202.5 | 392.5                                    | 41.5  | 296.5   | 367.5 |
| 50                                      | 0     | 101.5   | 159.5 |                                          |       | 37.5    | 118   |
| 260.5                                   | 193.5 | 355.5   | 301.5 |                                          |       | 56      | 226   |
| 183.5                                   | 123.5 | 107     | 109   |                                          |       | 91.5    | 194   |
| 97                                      | 71    | 175.5   | 496.5 | <b>Sum</b>                               | 7823  | 2390    | 3382  |
| 45.5                                    | 27    | 152     | 206.5 | <b>Mean</b>                              | 325.9 | 99.56   | 125.3 |
| 99                                      | 223.5 | 94.5    | 646   |                                          |       |         | 3425  |
| 485.5                                   | 326   | 252     | 417.5 |                                          |       |         |       |
| 211                                     | 12    | 504     | 280.5 |                                          |       |         |       |
| 106.5                                   | 102   | 165.5   | 355   |                                          |       |         |       |
| 114.5                                   | 31    | 217.5   | 247   |                                          |       |         |       |
| 266.5                                   | 144.5 | 37      | 12    |                                          |       |         |       |
| 323                                     | 97.5  | 174     | 193   |                                          |       |         |       |
| 263.5                                   | 325   | 371.5   | 669.5 |                                          |       |         |       |
| 136                                     | 127.5 | 415     | 249.5 |                                          |       |         |       |
| 276.5                                   | 163.7 | 34      | 21    |                                          |       |         |       |
| 164                                     | 187   | 44.5    | 44.5  |                                          |       |         |       |
| 525.5                                   | 353.5 | 526.5   | 356.5 |                                          |       |         |       |
| 482.5                                   | 352   | 184     | 127.3 |                                          |       |         |       |
|                                         |       | 42.5    | 58    |                                          |       |         |       |
|                                         |       | 299     | 160   |                                          |       |         |       |
|                                         |       | 213.5   | 135.5 |                                          |       |         |       |
|                                         |       | 41.5    | 79.5  |                                          |       |         |       |
|                                         |       | 418.3   | 110.5 |                                          |       |         |       |
|                                         |       | 421     | 159   |                                          |       |         |       |
|                                         |       | 231     | 81.5  |                                          |       |         |       |
| <b>Sum</b>                              | 12761 | 8166    | 10736 |                                          |       |         |       |
| <b>Mean</b>                             | 303.8 | 194.4   | 219.1 |                                          |       |         |       |

<sup>1</sup>Infiltrating leukocytes in hematoxylin-eosin stained histological sections cut through the pupillary-optic nerve plane were counted under the microscope in a masked fashion. Counts from entire histological sections from each eye were averaged.
